# Supplementary material
Source: Springer Nature journal article supplement (https://www.springermedizin.de/resource/supplementary/12985_2006_224_MOESM4_ESM.pdf/9607522)
Supplement: MOESM4 [file 9607522]

| Gene Name                                | Ranavirus |          |          | Ranavirus                    |                                | Lymphocystivirus |            | Iridovirus | Chloriridovirus | Megalocytivirus |      |      |
|------------------------------------------|-----------|----------|----------|------------------------------|--------------------------------|------------------|------------|------------|-----------------|-----------------|------|------|
|                                          | FV3       | TFV      | ATV      | SGIV                         | GIV                            | LCDV-1           | LCDV-C     | IIV-6      | IIV-3           | ISKNV           | RBIV | OGIV |
| N System amino acid transporter          |           |          |          | 5L                           | 114L                           |                  |            |            |                 | 1L              | 1L   | 1L   |
| ICP-46                                   | 5R        | 6R       |          |                              |                                |                  |            |            |                 |                 | 77R  | 79R  |
| Unknown ATV p04                          | 4R        | 5R       | 4R       | 15L                          | 1.5L                           |                  |            |            |                 |                 |      |      |
| Unknown ATV p08                          | 10R       | 10R      | 8R       | 59L                          | 35.5L                          |                  |            |            |                 |                 |      |      |
| Unknown                                  | 11R       | 11R      | 88L      | 103R                         | 70R                            |                  |            |            |                 |                 |      |      |
| Unknown (ATV-p88)                        | 14R       | 15R      | 84L      | 135L                         | 90.5L                          |                  |            |            |                 |                 |      |      |
| SGIV-ORF043R                             | 17L       | 18L      | 81R      | 43R                          | 23R                            |                  |            |            |                 |                 |      |      |
| Unknown (ATV-p55/p56)                    | 23R, 24R  | 23R, 24R | 53R, 54R | 4L,89L,90L,91L,92L,93L,147L  | 113L,60L, 61L, 62L,63L,64L,98L |                  |            |            |                 |                 |      |      |
| Unknown                                  | 31R       | 32R      | 60R      | 14L                          | 1.3L                           |                  |            |            |                 |                 |      |      |
| SGIV-ORF009L                             | 34R       | 35.5R    | 62.5R    | 9L                           | 118L                           |                  |            |            |                 |                 |      |      |
| Unknown                                  | 43.5L*    | 46L      | 70L      | 20L                          | 5L                             |                  |            |            |                 |                 |      |      |
| Unknown (ATV-p63)                        | 46L       | 48L      | 72L      | 22L                          | 7L                             |                  |            |            |                 |                 |      |      |
| Unknown                                  | 47L       | 49L      | 73L      | 24L                          | 8L                             |                  |            |            |                 |                 |      |      |
| ATV-p78                                  | 48L       | 50L      | 74L      | 71R                          | 44R                            |                  |            |            |                 |                 |      |      |
| Unknown                                  | 59L       | 62L      | 45R      | 123L                         | 83L                            |                  |            |            |                 |                 |      |      |
| dUTPase                                  | 63R       | 68R      | 42L      | 49L                          | 28L                            |                  |            |            |                 |                 |      |      |
| CARD like caspase                        | 64R       | 69.5R    | 40L      | 48L                          | 27L                            |                  |            |            |                 |                 |      |      |
| Unknown                                  | 69R       | 74R      | 35L      | 143L                         | 94L                            |                  |            |            |                 |                 |      |      |
| Unknown                                  | 74L       | 79L      | 30R      | 137R                         | 92R                            |                  |            |            |                 |                 |      |      |
| Unknown                                  | 75L       | 80L      | 29R      | 136R                         | 91R                            |                  |            |            |                 |                 |      |      |
| FV-3 orf 76R                             | 76R       | 81R      | 28L      | 119R                         | 80.5R                          |                  |            |            |                 |                 |      |      |
| ATV-p79                                  | 89R       | 95R      | 15L      | 71R                          | 44R                            |                  |            |            |                 |                 |      |      |
| Unknown                                  | 78L       | 83L      |          | 122L                         | 82L                            |                  |            |            |                 |                 |      |      |
| ATPase-dependent protease                | 79R       | 84R      | 26L      | 83R                          | 54R                            |                  |            |            |                 |                 |      |      |
| ICP-46                                   | 82R       | 87R      | 23L      | 86R                          | 57R                            |                  |            |            |                 |                 |      |      |
| Unknown                                  | 70R       | 75R      | 34.5L    | 139R                         | 92.5R                          |                  |            |            |                 |                 |      |      |
| Unknown                                  | 18L       | 18.5L    | 80.5R    | 42R                          |                                |                  |            |            |                 |                 |      |      |
| Unknown                                  | 3R        | 4R       | 3R       | 16L                          | 2L                             |                  |            | 229L       | 97L             |                 |      |      |
| Helicase                                 | 55L       | 56L      | 50R      | 152R                         | 102R                           |                  |            | 161L       | 108L, 109L      |                 |      |      |
| Unknown                                  | 32R       | 33R      | 61R      | 12L                          | 120.5L                         | 161R             | 033R       |            |                 |                 |      |      |
| Unknown                                  | 33R       | 34R      | 62R      | 11L                          | 119L                           | 113L             | 023R       |            |                 |                 |      |      |
| Unknown                                  | 45L       | 47L      | 71L      | 21L                          | 6L                             | 36R              | 012R       |            |                 |                 |      |      |
| ATV-p79                                  | 49L,50L   | 51L,52L  | 75L      | 25L                          | 9L                             | 110L             | 062R       |            |                 |                 |      |      |
| AcetylCoA Hydrolase                      | 51R       | 53R      | 76R      | 26R                          | 10R                            | 48R              | 161L       |            |                 |                 |      |      |
| 3β-hydroxy-Δ5-C27 steroid oxidoreductase | 52L       | 54L      | 52R      | 3R                           | 111R                           | 153L             | 003R       |            |                 |                 |      |      |
| NTPase-helicase like                     | 73L       | 78L      | 31R      | 146L                         | 97L                            | 107R             | 143R       |            |                 |                 |      |      |
| Unknown                                  | 96R       | 103R     | 89R      | 111R                         | 74R                            | 193L             | 039R       |            |                 |                 |      |      |
| Unknown                                  | 77L       | 82L      | 27R      | 120L                         | 81L                            | 32R              | 009L       |            |                 |                 |      |      |
| Unknown                                  | 87L       | 93L      | 17R      | 69L                          | 42L                            | 39R              | 29R        |            |                 |                 |      |      |
| Putative myeloid cell leukemia protein   | 97R       | 104R     | 90R      | 115R                         | 78R                            |                  | 189R       |            |                 |                 |      |      |
| Serine-threonine protein kinase          | 2.5L      | 2.5L     | 2L       | 18R                          | 3R                             | 93R              | 150R       |            |                 |                 |      |      |
| Cytosine DNA Methyltransferase           | 83R       | 89R      | 21L      |                              |                                | 5L               | 086L       |            |                 | 46L             | 46L  | 48L  |
| Unknown                                  | 20R       | 20R      | 79L      | 38L                          | 20L                            | 194R             | 073R       | 117L       | 107R            |                 |      |      |
| Ribonucleotide reductase α subunit       | 38R       | 41R      | 65R      | 64R                          | 39R                            | 176L             | 172L       | 85L        | 65R             |                 |      |      |
| Unknown                                  | 28R       | 30R      | 59R      | 160L                         | 107L                           | 90R              | 147L       | 454R       | 92R             |                 |      |      |
| Collagen-like                            | 65L, 66L  | 70.5L    | 38.5R    | 7L,8L,45L,46L, 55R, 56R,112R | 116L,117L,24L, 25L,33R,34R,75R | 63L              | 154R, 216L | 438L       |                 |                 |      |      |
| Unknown                                  | 58.5R     | 61R      | 46L      | 157R                         | 106R                           | 167L             |            | 170L       |                 |                 |      |      |
| Unknown early                            | 25R       | 25R      | 55R      | 6R                           | 115R                           | 122R             | 034L       |            | 7R              | 117L            | 111L | 114L |
| Tumor necrosis factor receptor           |           |          |          | 50L, 51L, 96R                | 29L, 30L, 65R                  |                  | 016L, 95R  |            |                 |                 |      |      |
| Unknown                                  |           |          |          | 75R                          | 48R                            | 185R             | 053L       |            |                 |                 |      |      |
| Unknown                                  |           |          |          | 140R+141R                    | 93R                            | 190L             | 237L       |            |                 |                 |      |      |
| Unknown                                  |           |          |          | 148R                         | 99R                            | 59L              | 157R       |            |                 |                 |      |      |
| Papain like proteinase                   |           |          |          |                              |                                | 43R              | 224L       | 224L, 361L | 24R             |                 |      |      |
| Antimutator GFP pyrophosphohydrolase     |           |          |          |                              |                                | 22R              | 221R       | 30L, 414L  | 111R            |                 |      |      |
| Thymidylate synthase                     |           |          |          |                              |                                |                  | 011L       | 225R       |                 |                 |      |      |
| Evr-1/Alr-like thiol oxidoreductase      |           |          |          |                              |                                | 81R              | 149R       | 347L, 453L | 96R, 41R        |                 |      |      |
